# Supplementary material
Source: PubMed Central journal article supplement (PMC3989618)
Supplement: embj0033-0247-sd3.pdf [file embj0033-0247-sd3.pdf]

Supplementary Material 3 Number of Electron-dense connection of vesicles to ribbon.

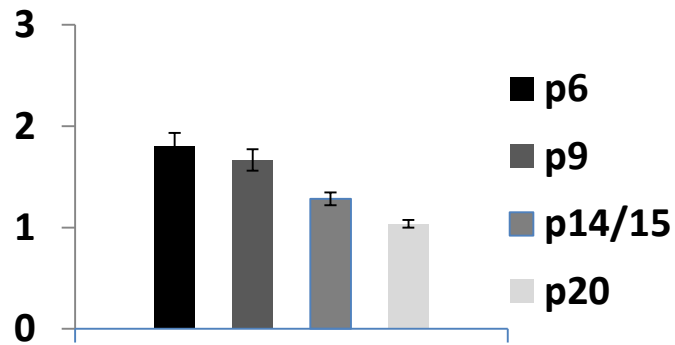

Figure S3. Quantification of the number of electron-dense connections. Number of electron-dense connections from the membrane of the active zone to the synaptic ribbon observed in random synaptic sections along development.
