# Supplementary material
Source: PubMed Central journal article supplement (PMC3989618)
Supplement: embj0033-0247-sd8.pdf [file embj0033-0247-sd8.pdf]

Supplementary Material 8 Supplementary figure for apparent  $\text{Ca}^{2+}$ -cooperativity of exocytosis measurement

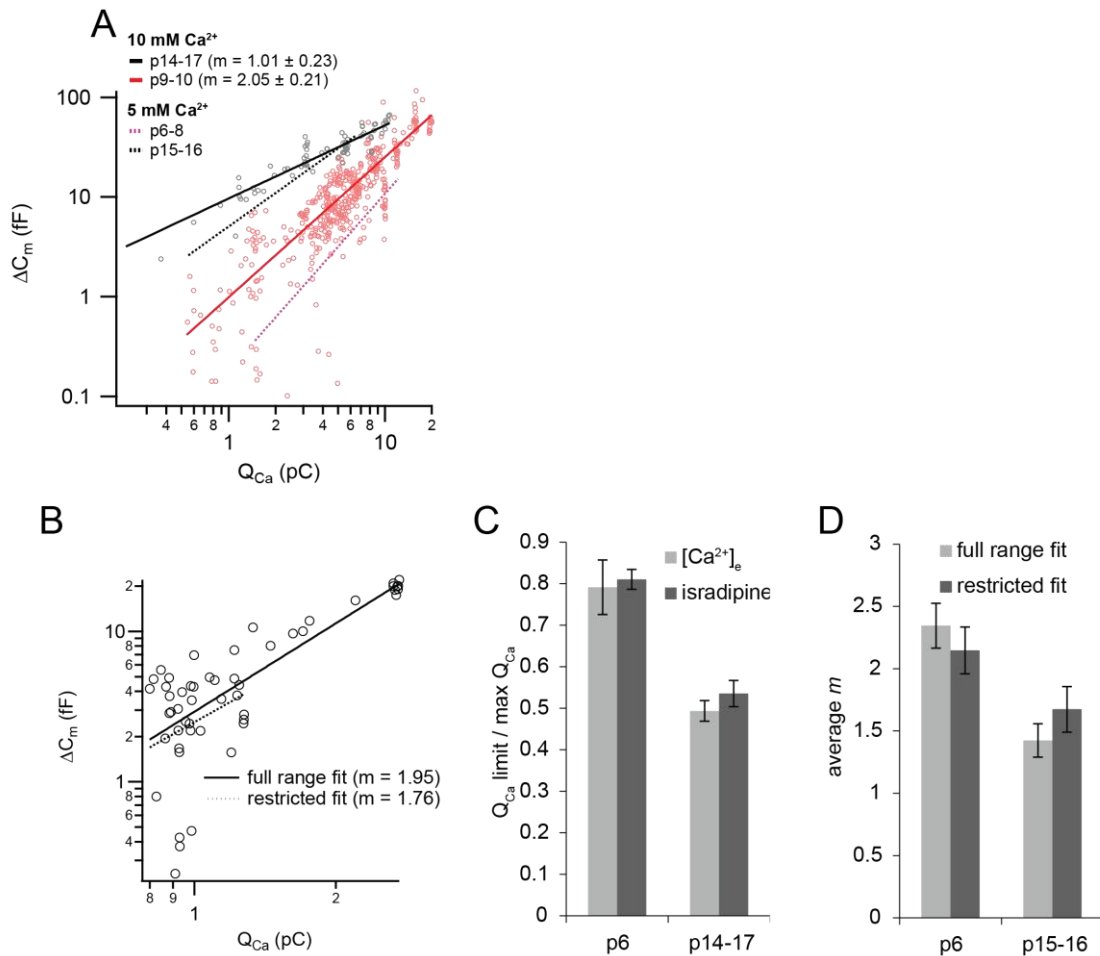

Figure S8. Additional data for apparent  $\text{Ca}^{2+}$ -cooperativity of exocytosis measurement. (A) Apparent  $\text{Ca}^{2+}$ -cooperativity of exocytosis in developing IHCs probed at 10 mM extracellular calcium. Open circles are raw data points obtained from p14-17 (grey,  $n = 4$  IHCs) and p10 (pink,  $n = 5$  IHCs) with slow perfusion of 10  $\mu\text{M}$  isradipine, performed in the presence of 10 mM  $[\text{Ca}^{2+}]_e$ . Solid lines are power function fits to the combined datasets. Average exponents from fitting individual cells are:  $1.01 \pm 0.23$  (p14-17) and  $2.05 \pm 0.21$  (p9-10). For comparison, dotted lines show power fits to p15-16 (black) and p6-8 (magenta) data performed in 5 mM  $[\text{Ca}^{2+}]_e$ , as displayed in Figure 7 in the main figure. (B-D) Probing saturation with a restricted  $Q_{\text{Ca}}$  fitting range. (B) Data from an example p15 IHC in isradipine experiments (5 mM  $[\text{Ca}^{2+}]_e$ ), where datapoints were either fitted with the full (solid line) or restricted (dotted line)  $Q_{\text{Ca}}$  range, as a fraction of the

maximum  $Q_{Ca}$  per cell (see panel C). (C) Average  $Q_{Ca}$  range where limited saturation was found in  $[Ca^{2+}]_e$  experiments, and the average actual  $Q_{Ca}$  range used for restricted fitting for isradipine experiments, both expressed as a ratio to maximum  $Q_{Ca}$ . (D) Average power,  $m$ , from fitting the full and restricted  $Q_{Ca}$  range in isradipine experiments.
